# Supplementary material for: Potential Zoonotic Pathovars of Diarrheagenic Escherichia coli Detected in Lambs for Human Consumption from Tierra del Fuego, Argentina
Source: MDPI journal article supplement (doi:10.3390/microorganisms9081710), 2021-08-11
Supplement: s1 [file s1]

Table S1. Oligonucleotides used for screening and isolation of DEC pathovars

| Target gene                 | Primer sequence                                     | Amplicon | Reference                       |
|-----------------------------|-----------------------------------------------------|----------|---------------------------------|
| <i>stx</i> <sub>1</sub>     | GAAGAGTCCGTGGGATTACG<br>AGCGATGCAGCTATTAATAA        | 130      | Leotta <i>et al.</i> ,<br>2005. |
| <i>stx</i> <sub>2</sub>     | TTAACCACACCCCACCGGGCAGT<br>GCTCTGGATGCATCTCTGGT     | 346      |                                 |
| <i>rfb</i> O <sub>157</sub> | CGGACATCCATGTGATATGG<br>TTGCCTATGTACAGCTAATCC       | 259      |                                 |
| <i>eae</i>                  | GGAACGGCA GAGGTAACTCTGCAG<br>GGCGCTCATCA TAGTCTTTC  | 346      | Blanco <i>et al.</i> ,<br>2003. |
| <i>aaiC</i>                 | TGGTGACTACTTTGATGGACATTGT<br>GACACTCTTCTGGGGTAAACGA | 313      | Boisen <i>et al.</i> ,<br>2012. |
| <i>aggR</i>                 | GTATACACAAAAGAAGGAAGC<br>ACAGAATCGTCAGCATCAGC       | 254      | Wieler <i>et al.</i> ,<br>2011. |

Table S2. Oligonucleotides used for characterization of DEC isolates

| Target gene              | Primer sequence                                                                                            | Amplicon  | Reference                        |
|--------------------------|------------------------------------------------------------------------------------------------------------|-----------|----------------------------------|
| <i>saa</i>               | CGTGATGAACAGGCTATTGC<br>ATGGACATGCCTGTGGCAAC                                                               | 119       | Paton and<br>Paton, 2002.        |
| <i>ehxA</i>              | GCATCATCAAGCGTACGTTCC<br>AATGAGCCAAGCTGGTTAAGCT                                                            | 534       | Paton and<br>Paton, 2002.        |
| <i>bfpA</i>              | AAT GGTGCTTGGCGTTGCTGC<br>GCCGCTTTATCCAACCTGGTA                                                            | 326       | Gunzburg <i>et al.</i> , 1995.   |
| O174wzx                  | TCTAGGACCTGTAGAACA<br>GTAGTTGATCTGAGCGAT                                                                   | 656       | Beutin <i>et al.</i> ,<br>2005.  |
| O174wzy                  | TATGGGTCCTATTACTTTC<br>GTATCGGAGATCATTATTAC                                                                | 759       |                                  |
| <i>stx</i> <sub>1a</sub> | CCTTTCCAGGTACAACAGCGGTT<br>GGAAACTCATCAGATGCCATTCTGG                                                       | 478       | Scheutz <i>et al.</i> ,<br>2012. |
| <i>stx</i> <sub>1c</sub> | CCTTTCCTGGTACAACCTGCGGTT<br>CAAGTGTTGTACGAAATCCCCTCTGA                                                     | 252       |                                  |
| <i>stx</i> <sub>1d</sub> | CAGTTAATGCGATTGCTAAGGAGTTTACC<br>CTCTTCCTCTGGTTCTAACCCCATGATA                                              | 203       |                                  |
| <i>stx</i> <sub>2a</sub> | GCGATACTGRGBACTGTGGCC<br>CCGKCAACCTTCACTGTAAATGTG<br>GCCACCTTCACTGTGAATGTG                                 | 349 - 347 |                                  |
| <i>stx</i> <sub>2b</sub> | AAATATGAAGAAGATATTTGTAGCGGC<br>CAGCAAATCCTGAACCTGACG                                                       | 251       |                                  |
| <i>stx</i> <sub>2c</sub> | GAAAGTCACAGTTTTTATATACAACGGGTA<br>CCGGCCACYTTTACTGTGAATGTA                                                 | 177       |                                  |
| <i>stx</i> <sub>2d</sub> | AAARTCACAGTCTTTATATACAACGGGTG<br>TTYCCGGCCACTTTTACTGTG<br>TCAACCGAGCACTTTGCAGTAG<br>GCCTGATGCACAGGTACTGGAC | 179 – 280 |                                  |
| <i>stx</i> <sub>2e</sub> | CGGAGTATCGGGGAGAGGC<br>CTTCCTGACACCTTCACAGTAAAGGT                                                          | 411       |                                  |
| <i>stx</i> <sub>2f</sub> | TGGGCGTCATTCCTGCTTG<br>TAATGGCCGCCCTGTCTCC                                                                 | 424       |                                  |
| <i>stx</i> <sub>2g</sub> | CACCGGGTAGTTATATTTCTGTGGATATC<br>GATGGCAATTCAGAATAACCGCT                                                   | 573       |                                  |
